# Supplementary material for: Functionalization of Bacterial Cellulose with the Antimicrobial Peptide KR-12 via Chimerical Cellulose-Binding Peptides
Source: MDPI journal article supplement (doi:10.3390/ijms25031462), 2024-01-25
Supplement: s1 [file s1]

## SUPPLEMENTARY MATERIALS

# Functionalization of Bacterial Cellulose with the Antimicrobial Peptide KR-12 via Chimerical Cellulose Binding Peptides

Elizabeth M. van Zyl<sup>a</sup>, Jeannine M. Coburn<sup>a,\*</sup>

<sup>a</sup> Department of Biomedical Engineering, Worcester Polytechnic Institute, Worcester, MA 01609

Elizabeth M. van Zyl  
emvanzyl@wpi.edu  
Department of Biomedical Engineering  
Worcester Polytechnic Institute  
100 Institute Road  
Worcester, MA 01609  
United States of America

Jeannine M. Coburn  
\*Corresponding author  
jmcoburn@wpi.edu  
Department of Biomedical Engineering,  
Worcester Polytechnic Institute  
Ph: 508-831-6839  
100 Institute Road  
Worcester, MA 01609  
United States of America

**Total Pages: 5**

**Figures: 3**

**Tables: 1**

**Figure S1.** Representative images of NHDF on Day 3 after treatment with peptides.

**Figure S2.** Images of FAM-tagged peptides immobilized on opaque BC over 7 days.

**Figure S3.** Images of FAM-tagged peptides immobilized on transparent BC over 7 days.

**Table S1.** Minimum inhibitory concentration (MIC) of KR-12 containing peptides against the three bacteria species/strains evaluated.

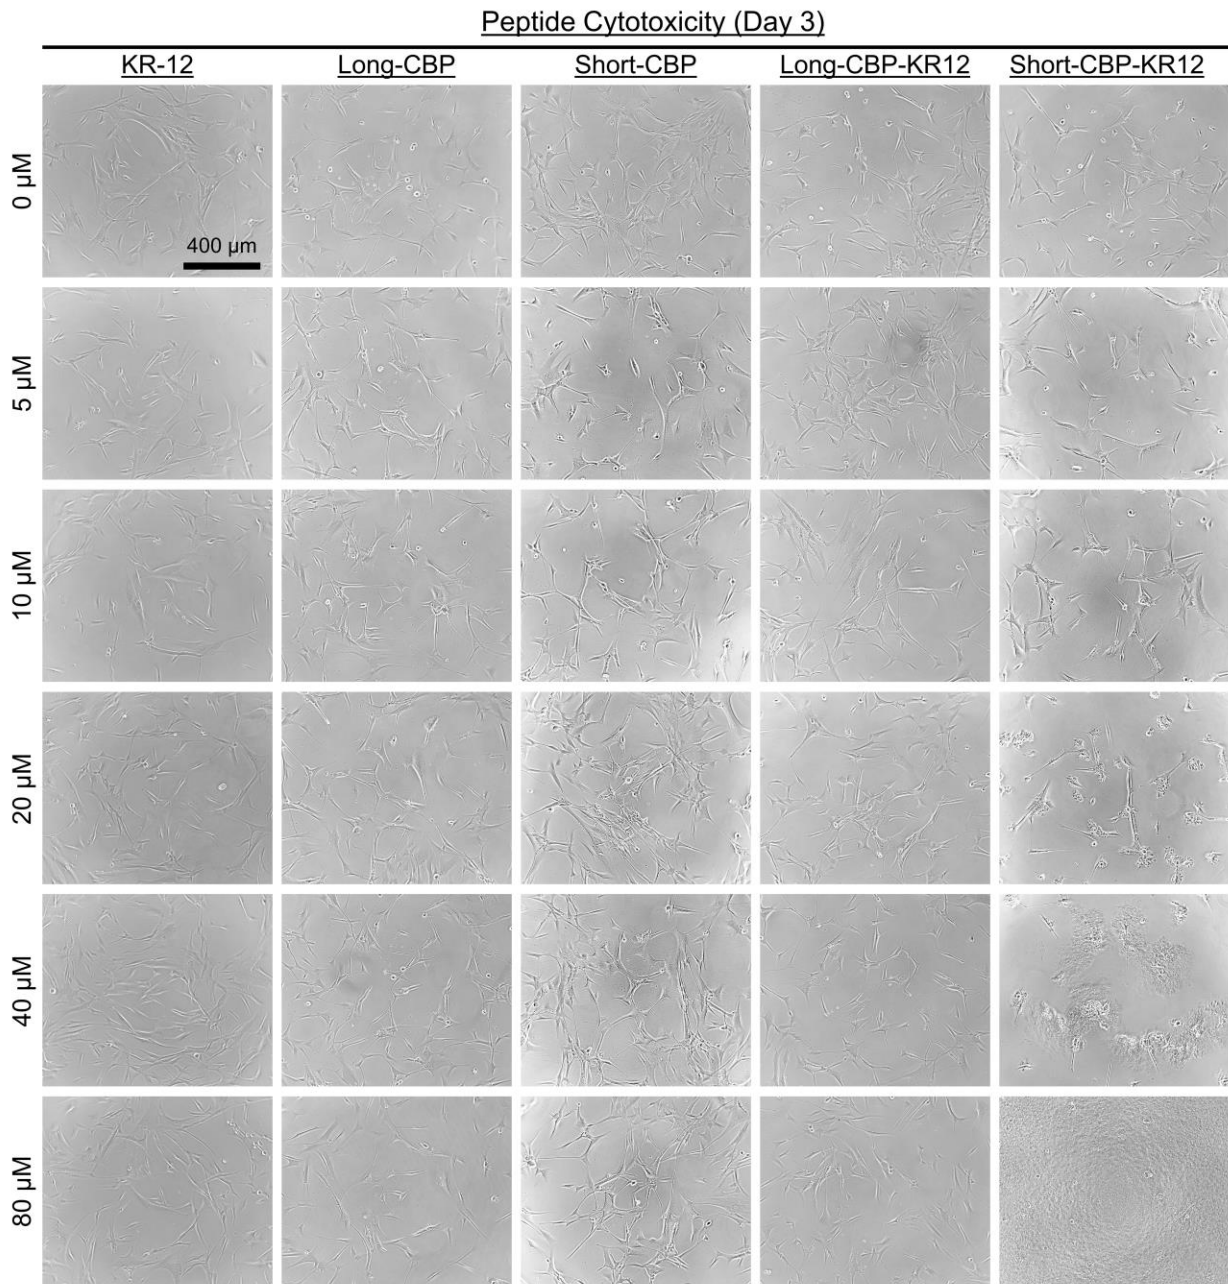

**Figure S1. Representative images of NHDF on Day 3 after treatment with peptides.**

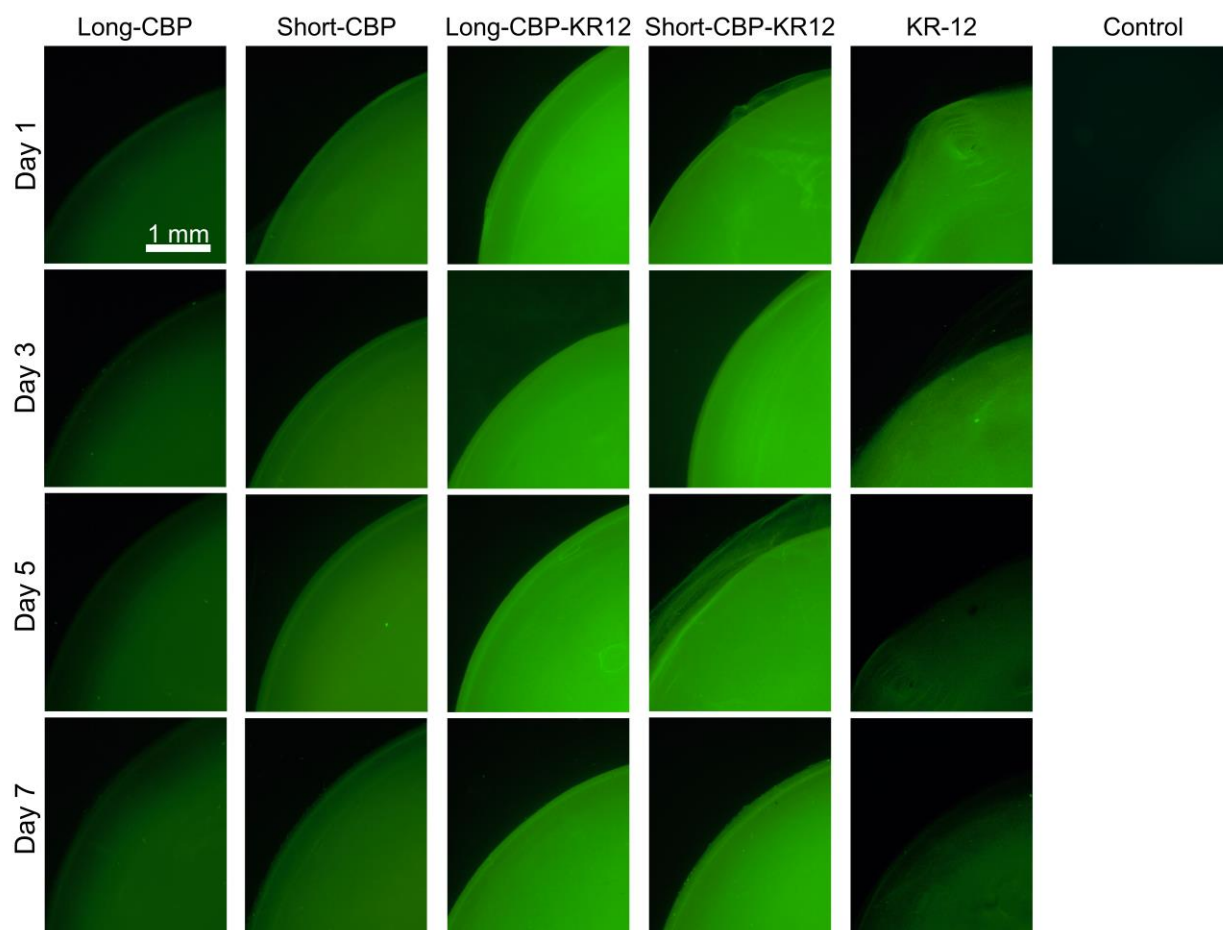

**Figure S2. Images of FAM-tagged peptides immobilized on opaque BC over 7 days.** Qualitative images of FAM-tagged peptide present on the surface of opaque 0% arabitol BC. Images were taken on days 1, 3, 5, 7 after initial rinsing. The gain and exposure time settings were kept constant for all images. The control image of unmodified BC shows no autofluorescence.

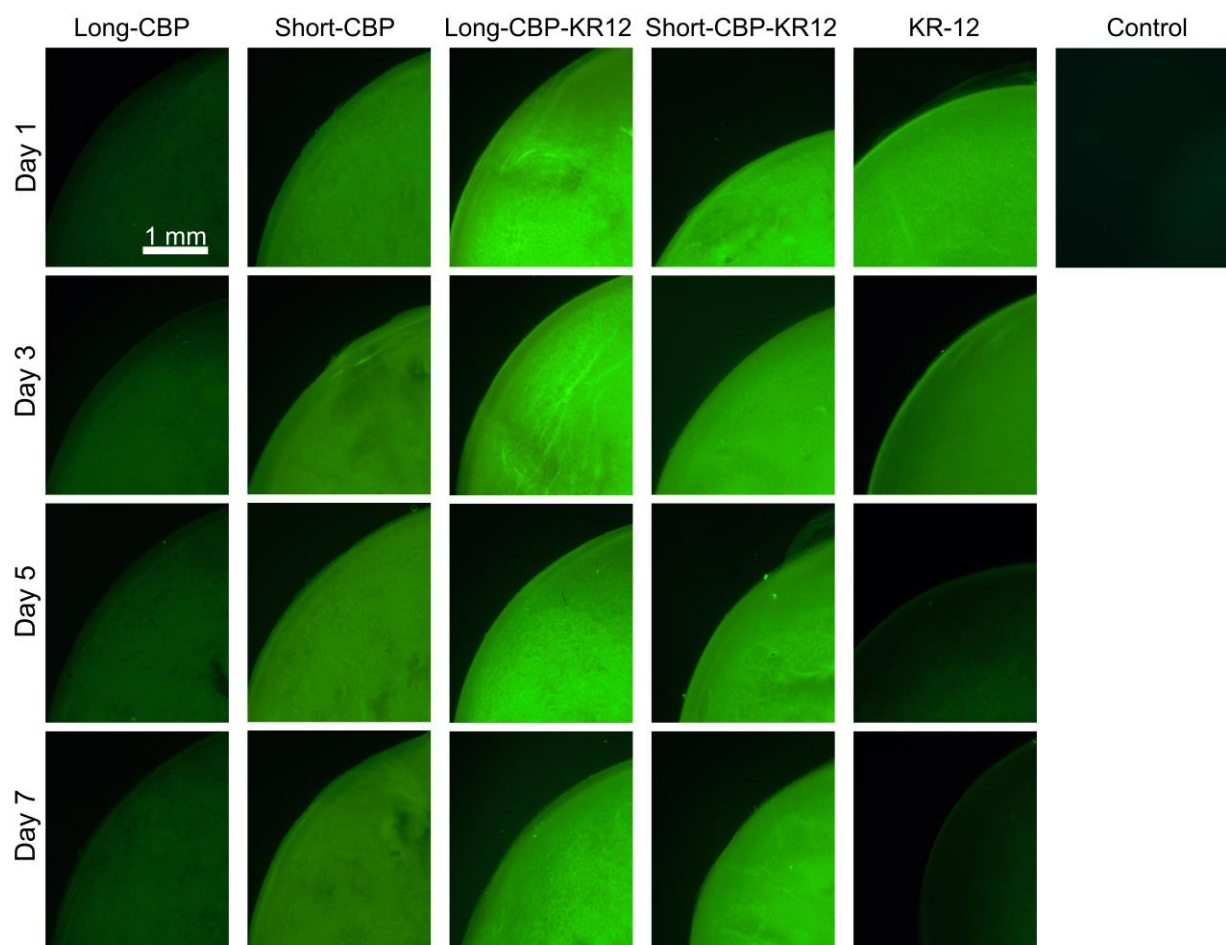

**Figure S3. Images of FAM-tagged peptides immobilized on transparent BC over 7 days.**

Qualitative images of FAM-tagged peptide present on the surface of transparent BC. Images were taken on days 1, 3, 5, 7 after initial rinsing. The intensity, exposure time, and gain settings were the same for all images. The control image of unmodified BC shows no autofluorescence.

**Table S1.** Minimum inhibitory concentration (MIC) of KR-12 containing peptides against the three bacteria species/strains evaluated.

| <b>Bacterial Species</b>      | <b>Minimum Inhibitory Concentration (μM)<sup>a</sup></b> |               |                |
|-------------------------------|----------------------------------------------------------|---------------|----------------|
|                               | KR-12                                                    | Long-CBP-KR12 | Short-CBP-KR12 |
| <i>Escherichia coli</i>       | 2.5                                                      | 10            | 10             |
| <i>Pseudomonas aeruginosa</i> | 10                                                       | >80           | 80             |
| <i>Staphylococcus aureus</i>  | >80                                                      | -             | -              |

<sup>a</sup>Minimum inhibitory concentration (MIC) determined as the lowest concentration to not be statistical significance compared to the sterile control as determined by an ANOVA followed by a Dunnett HSD test.
